# Supplementary material
Source: PubMed Central journal article supplement (PMC2782714)
Supplement: NIHMS158088-supplement-01.pdf [file NIHMS158088-supplement-01.pdf]

## Supplemental Data 1

*Pathway analysis between HNF-1 $\alpha$  (+/-)/RIP-Tag beta-cell line and HNF-1 $\alpha$  (++)/RIP-Tag beta-cell line or HNF-1 $\alpha$  (-/-)/RIP-Tag beta-cell line and HNF-1 $\alpha$  (+/+)/RIP-Tag beta-cell line.*

| Network                                                         | Score | Focus genes | Top functional categories                                                                            |
|-----------------------------------------------------------------|-------|-------------|------------------------------------------------------------------------------------------------------|
| <b>H1A (+/-)/RIP-Tag versus H1A (++)/RIP-Tag beta-cell line</b> |       |             |                                                                                                      |
| 1                                                               | 60    | 35          | Cellular Growth and Proliferation, Cell Death, Cancer                                                |
| 2                                                               | 25    | 20          | Cellular Assembly and Organization, Cell Cycle, DNA Replication, Recombination, and Repair           |
| 3                                                               | 19    | 17          | Cellular Movement, Cellular Assembly and Organization, Nervous System Development and Function       |
| 4                                                               | 18    | 16          | Gene Expression, Cancer, Cell Cycle                                                                  |
| 5                                                               | 18    | 16          | Cancer, Cellular Growth and Proliferation, Immunological Disease                                     |
| 6                                                               | 18    | 16          | Cancer, Cellular Growth and Proliferation, DNA Replication, Recombination, and Repair                |
| 7                                                               | 18    | 16          | Cellular Growth and Proliferation, Renal and Urological Disease, Drug Metabolism                     |
| <b>H1A (-/-)/RIP-Tag versus H1A (++)/RIP-Tag beta-cell line</b> |       |             |                                                                                                      |
| 1                                                               | 49    | 33          | Cellular Growth and Proliferation, Cell Signaling, Nucleic Acid Metabolism                           |
| 2                                                               | 20    | 19          | Cell Death, Dermatological Diseases and Conditions, Connective Tissue Disorders                      |
| 3                                                               | 17    | 17          | Cell Cycle, Cellular Movement, Cellular Development                                                  |
| 4                                                               | 15    | 16          | Molecular Transport, RNA Trafficking, Cell-To-Cell Signaling and Interaction                         |
| 5                                                               | 14    | 15          | Carbohydrate Metabolism, Small Molecule Biochemistry, Cardiovascular System Development and Function |
| 6                                                               | 14    | 15          | Cellular Movement, Cancer, Reproductive System Disease                                               |
| 7                                                               | 14    | 15          | Hematological System Development and Function, Cardiovascular Disease, Hematological Disease         |
| 8                                                               | 14    | 15          | Cell Signaling, Cellular Assembly and Organization, Cellular Compromise                              |

# Supplemental Data 2

A

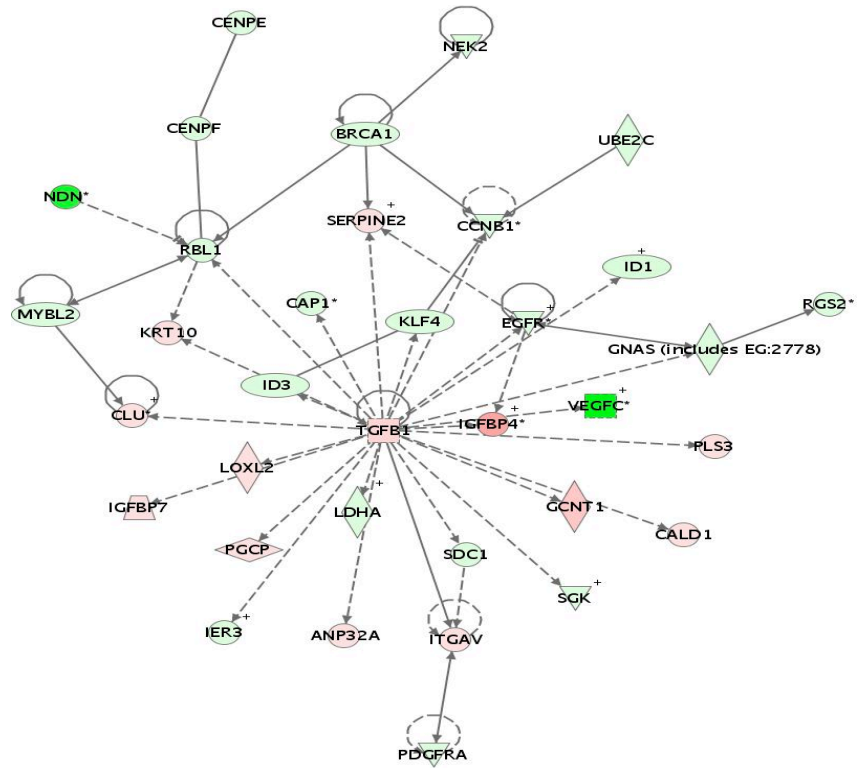

B

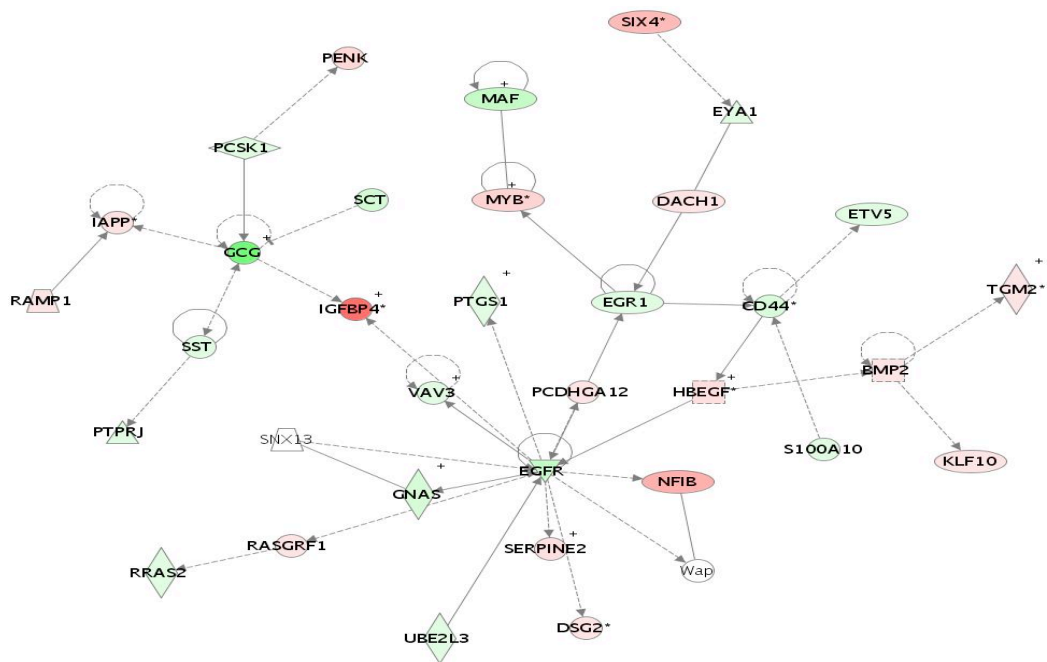

### Supplemental Data 3

*Real-time PCR analysis for SERPINE2, IGFBP4, TGFB1 and IGFBP7 in HNF-1 $\alpha$*

|          | H1A (+/+)-Tag | H1A (+/-)-Tag    | H1A (-/-)-Tag    |
|----------|---------------|------------------|------------------|
| n        | 4             | 4                | 4                |
| SERPINE2 | 1.0 $\pm$ 0.1 | 13.4 $\pm$ 2.5*  | 13 $\pm$ 0.8*    |
| IGFBP4   | 1.0 $\pm$ 0.1 | 4.9 $\pm$ 0.6*   | 16.8 $\pm$ 0.6*# |
| TGFB1    | 1.0 $\pm$ 0.1 | 150.6 $\pm$ 18.* | 28.0 $\pm$ 3.9*# |
| IGFBP7   | 1.0 $\pm$ 0.1 | 4.1 $\pm$ 0.1*   | 2.3 $\pm$ 0.1*#  |

*(+/+)/RIP-Tag, HNF-1 $\alpha$  (+/-)/RIP-Tag and HNF-1 $\alpha$  (-)/RIP-Tag beta-cell lines.*

\* $P < 0.05$  compared with H1A (+/+)-Tag

# $P < 0.05$  compared with H1A (+/-)-Tag

## Supplemental Data 4

*Changes of beta-cell related genes in HNF-1 $\alpha$  (+/+)/RIP-Tag, HNF-1 $\alpha$  (+/-)/RIP-Tag and HNF-1 $\alpha$  (-/-)/RIP-Tag beta-cell lines.*

| Accession                         | gene                                 | fold change |           |
|-----------------------------------|--------------------------------------|-------------|-----------|
|                                   |                                      | +/- / +/+   | -/- / +/+ |
| <b>hormone and growth factors</b> |                                      |             |           |
| NM_008386                         | insulin I                            | 1.26        | 1.23      |
| NM_008387                         | insulin II                           | 1.07        | 1.01      |
| AF276754                          | glucagon                             | 0.25        | 0.07      |
|                                   |                                      |             | ↓         |
|                                   |                                      |             | ↓         |
| <b>transcription factors</b>      |                                      |             |           |
| AK020261                          | Pdx-1                                | 0.87        | 0.99      |
| NM_010446                         | forkhead box A2 (Foxa-2)             | 1.97        | 1.63      |
|                                   |                                      | ↑           | ↑         |
| AF357883                          | Nkx-6.1                              | 1.18        | 1.25      |
| NM_010919                         | Nkx-2.2                              | 1.60        | 1.39      |
|                                   |                                      | ↑           |           |
| AF031150                          | Pax-4                                | 1.67        | 1.12      |
|                                   |                                      | ↑           |           |
| BC011272                          | Pax-6                                | 1.12        | 1.21      |
| AK008017                          | Ngn-3                                | 1.00        | 1.15      |
| BQ176915                          | isl-1                                | 0.64        | 0.92      |
|                                   |                                      | ↓           |           |
| BM116592                          | NeuroD-1                             | 1.29        | 0.87      |
| <b>glucose metabolism</b>         |                                      |             |           |
| NM_013631                         | liver pyruvate kinase (L-Pk)         | 0.99        | 0.87      |
| NM_031197                         | glucose transporter type 2 (Glut2)   | 1.13        | 0.93      |
| BC024112                          | aldolase B                           | 0.87        | 0.87      |
| BC011139                          | glucokinase                          | 1.58        | 1.56      |
|                                   |                                      | ↑           | ↑         |
| <b>others</b>                     |                                      |             |           |
| NM_010512                         | insulin-like growth factor 1 (IGF-1) | 1.09        | 1.06      |
| NM_009864                         | E-cadherin                           | 1.60        | 1.02      |
|                                   |                                      | ↑           |           |
| AI314694                          | Tmem27                               | 1.17        | 0.65      |
|                                   |                                      |             | ↓         |

Abbreviations: +/+, H1A(+)/RIP-Tag; +/-, H1A(+/-)/RIP-Tag; -/-, H1A(-)/RIP-Tag

A single arrow and a double arrow show changes of 1.5~ 2-fold or > 2-fold, respectively.
